# Supplementary material
Source: Research Square preprint supplement (doi:10.21203/rs.3.rs-9275393/v1)
Supplement: Supplementary file 1 [file 697e31a3a1a351867167c1cc.xlsx]

## Sheet: Sheet1
Supplementary Table (S1)
Table S1.1 Primer sequences for qPCR
Gene		Primer Sequence
LSM4	Forward	GGGAGACGTACAATGGACACC
LSM4	Reverse	ACGTGCAGATGACTTCTCGC
GAPDH	Forward	GGAGCGAGATCCCTCCAAAAT
GAPDH	Reverse	GGCTGTTGTCATACTTCTCATGG
Table S1.2 Primer sequences for siRNA
Gene		Primer Sequence
siLSM4 （1）	Forward	CCAUGUUGGUGGAGCUGAA
	Reverse	UUCAGCUCCACCAACAUGG
siLSM4 （2）	Forward	GCUGCGACAACUGGAUGAA
	Reverse	UUCAUCCAGUUGUCGCAGC
siLSM4 （3）	Forward	AGAUCAUCGACAUGGUCAA
	Reverse	UUGACCAUGUCGAUGAUCU
Table S1.3 Primer sequences for shRNA
Gene		Primer Sequence
LSM4-RNAi （130397-1）	Forward	CGAGATCATCGACATGGTCAA
	Reverse	TTGACCATGTCGATGATCTCG
LSM4-RNAi （130398-11）	Forward	ATGAACATTAACCTGCGAGAA
	Reverse	TTCTCGCAGGTTAATGTTCAT
LSM4-RNAi （130399-2）	Forward	GGGACAAGTTCTGGCGGATGC
	Reverse	GCATCCGCCAGAACTTGTCCC
Table S1.4 Primer sequences for Alternative splicing events
Gene		Primer Sequence
EDN2 （1）	Forward	GTGAACACTCCTGAACAGACAGCTC
	Reverse	TCTCTTCCTCCACCTGGAATGTGTG
EDN2 （2）	Forward	AAGGAGTGCGTCTACTTCTGCCA
	Reverse	TCTCTTCCTCCACCTGGAATGTG
TATDN3 （1）	Forward	GGACTTTGACCGCGATTTGGATGA
	Reverse	TGTTCACCAGTGCCAGCAAATCT
TATDN3 （2）	Forward	ACTTTCAGAAAGGTATAATGGGTTT
	Reverse	GCAAATTTAGTCTTTTGGCTAACTG
TATDN3 （3）	Forward	AGTCCTAATCAGACAGATCCAG
	Reverse	CTAGTGCAGGTGAATCTGTTTC
EEF2KMT （1）	Forward	TTGCACAAGACTGTGAAGCATCCT
	Reverse	GATGGCCCATTCTGCAAGGTAGAG
EEF2KMT （2）	Forward	CGAACTCTTGCTGCAGAGTTTCGAG
	Reverse	CGCTTCATACAGCTCGTCCAAAGG
DCLRE1C	Forward	TTGTTGTTAACGAGCCCGAAATACA
	Reverse	CCATTCTAGCAGCTTCTCCTTGCG
RASSF6	Forward	ATCTCAAAAAGGAGGAAAAGATGAC
	Reverse	TTTTAGCTGTATAGGTCGTTTTACT
KITLG	Forward	ACTTTGTAGTGGCATCTGAAACTA
	Reverse	GCCAATTATAAGAGAAAACAATGCT
MAST1 （1）	Forward	GGGTCATGTCTGACTCTCTCTGGAC
	Reverse	CCATAGCCAGATGAAGGGAGCGAG
MAST1 （2）	Forward	AAAAGCCTCATCCTGACCAGCAC
	Reverse	CCCGAAGTGTTTGGAGAGGAAGTG
ARHGEF4 （1）	Forward	CATCCACTCTCCCAGAGTGCTC
	Reverse	ATGGTGACATGGTCCCAGAGTG
ARHGEF4 （2）	Forward	CCAACGTCATCAACGAGATCCTCAG
	Reverse	GTACACGTACTTGCTGAGCTTGGTG
NAP1L1 （1）	Forward	TGTGCACAGATAGAAGCCAAATTCT
	Reverse	TTCAGAATAGGTTCATCGTGTTCCT
NAP1L1 （2）	Forward	AAGAGGAAACTGGTGAAGAAACA
	Reverse	TCTTCAATCTTGGCCTTTTCTTT
NAP1L1 （3）	Forward	GCCGATATTTGGAGTTCTTACAACA
	Reverse	ATAGAGGCTGATAGAGAACAGCATA
NAP1L1 （4）	Forward	TGGCTCCCCATACTAGTCGC
	Reverse	AGGGCTGCAAGAATCTGAGG
CSAD （1）	Forward	GAAAATGGTCCCCGAGGATCTG
	Reverse	TTGAGCAGGTTCGAGGTATCC
CSAD （2）	Forward	GATCACTTGAGGTCAGGAGTTCGAG
	Reverse	TCAAAGCATATAAACATTGCGCAGG
CSAD （3）	Forward	TCAACACCAGCCAGTACACATATGA
	Reverse	CCATTTTCCCTCTCTCATCAGCCTT
CSAD （4）	Forward	GCCAGTACACATATGAAATCGCCC
	Reverse	CTCTCTCATCAGCCTTGACCACTC
CSAD （5）	Forward	ACACCAGCCAGTACACATATGAAAT
	Reverse	GACCATTTTCCCTCTCTCATCAGCC
CSAD （6）	Forward	CACAGAAGCAGATCCTGGAGC
	Reverse	GATGTGAATAGGGCCAGGGGC
CSAD （7）	Forward	CAGTGTCAAGACTGGTCACCCT
	Reverse	CAGAAACGCAGCTCCCTTCT
